# Supplementary material for: Clustered regulatory elements at nucleosome-depleted regions punctuate a constant nucleosomal landscape in Schizosaccharomyces pombe
Source: PubMed Central journal article supplement (PMC4046669; doi:10.1186/1471-2164-14-813), 2013-11-21

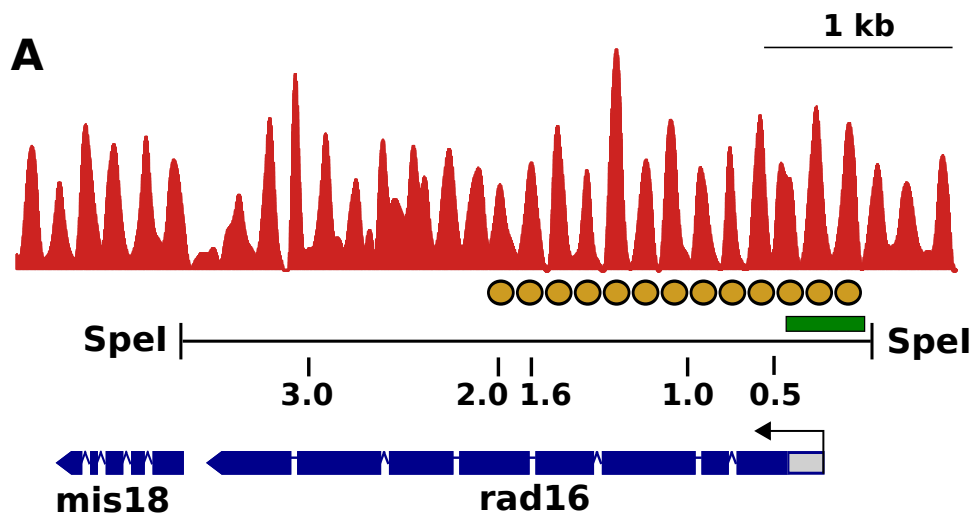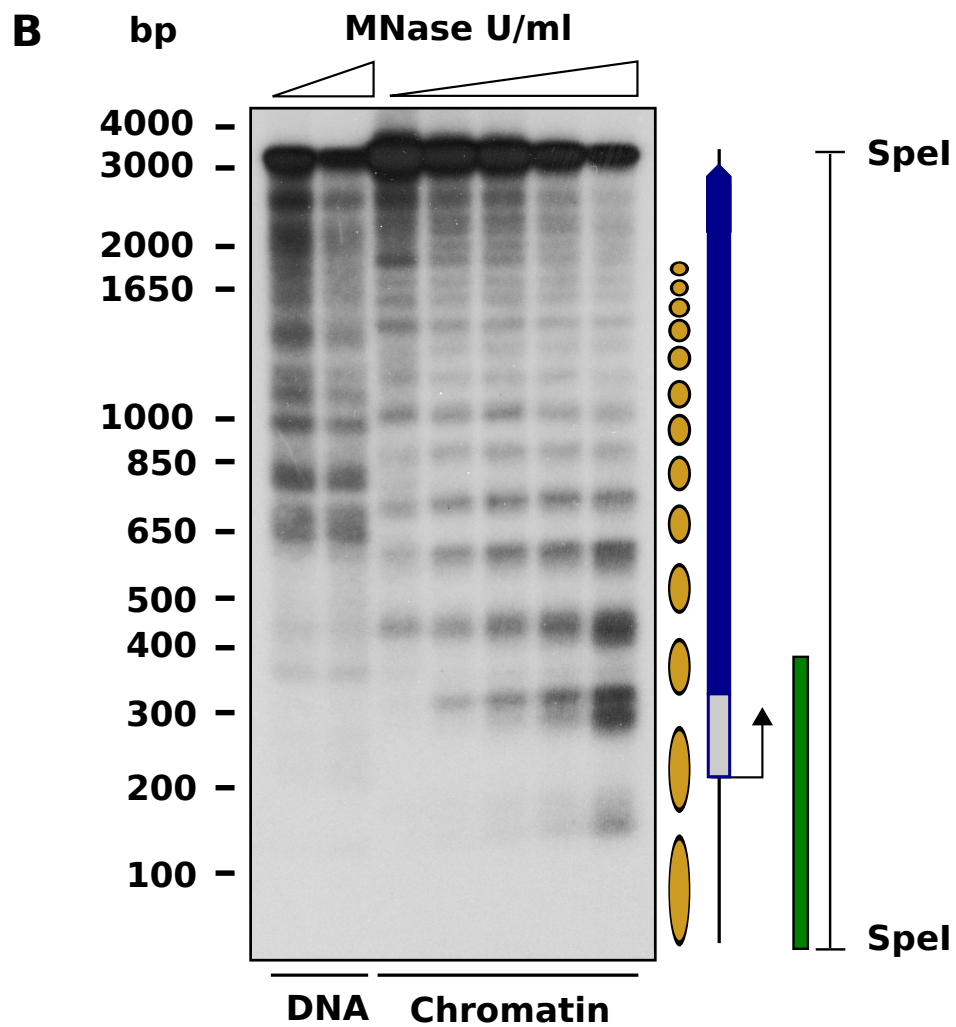

Supplement: 12864_2013_5520_MOESM2_ESM.pdf [file 12864_2013_5520_MOESM2_ESM.pdf]
